# Supplementary material
Source: Springer Nature journal article supplement (https://www.springermedizin.de/resource/supplementary/12885_2007_965_MOESM2_ESM.pdf/9471414)

# TP53(-) age ≤ 53

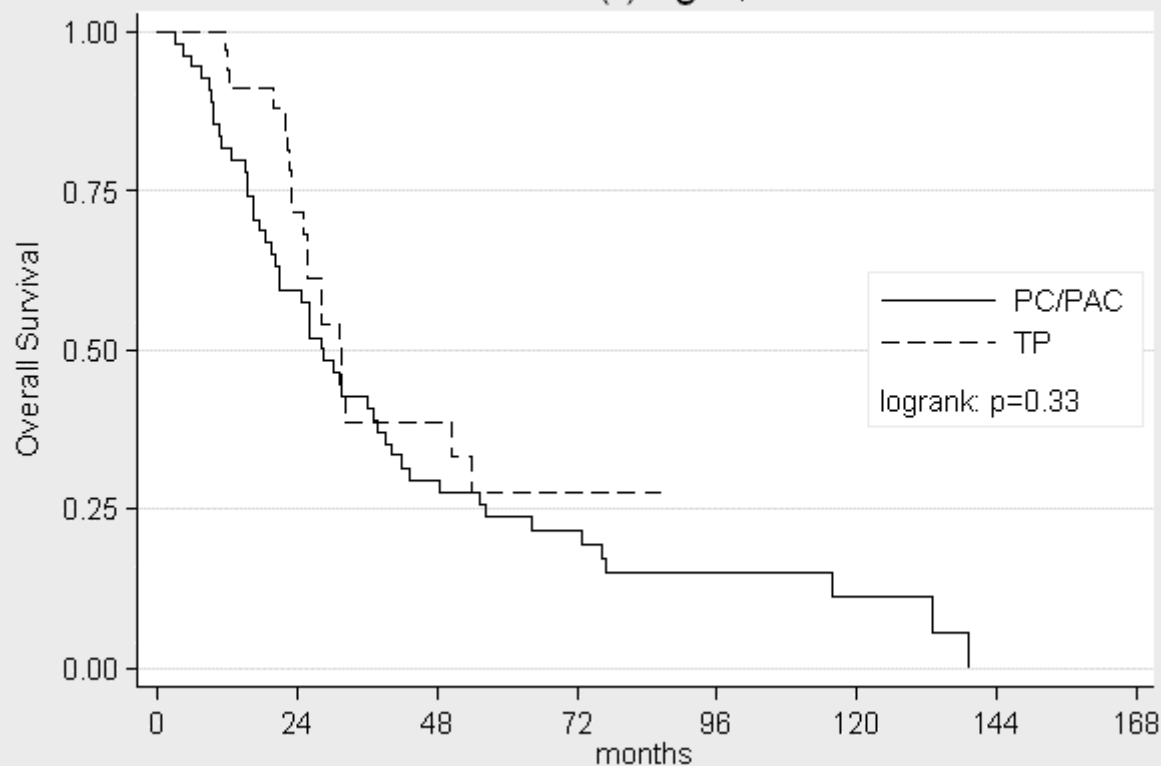

## Number of patients at risk

|        |    |    |    |    |   |   |
|--------|----|----|----|----|---|---|
| PC/PAC | 55 | 32 | 15 | 10 | 5 | 3 |
| TP     | 34 | 22 | 8  | 1  | - | - |

Supplement: MOESM2 [file 9471414]
